# Supplementary material for: Optimized Xenograft Protocol for Chronic Lymphocytic Leukemia Results in High Engraftment Efficiency for All CLL Subgroups
Source: MDPI journal article supplement (doi:10.3390/ijms20246277), 2019-12-12
Supplement: s1 [file s1]

**Table S1**

Patient characteristics of primary human CLL patients.

| CLL | Sex | Age | IgVH | Genetic aberration                       | Rai stage | Previous therapy  | Leukocytes [Tsd] | Monocytes [%] |
|-----|-----|-----|------|------------------------------------------|-----------|-------------------|------------------|---------------|
| #1  | Ma  | 63  | M    | normal                                   | 2         | None              | 124.1            | 0             |
| #2  | Ma  | 65  | M    | Trisomy 12                               | 2         | Chlorambucil      | 162.1            | 2             |
| #3  | Ma  | 70  | M    | Del 13q14                                | 2         | None              | 62.5             | 1             |
| #4  | Ma  | 74  | M    | normal                                   | 0         | Chlorambucil      | 93.7             | 0             |
| #5  | Ma  | 79  | M    | Trisomy 12, Del 13q14                    | 4         | Chlorambucil      | 86.5             | 1             |
| #6  | Fe  | 71  | M    | normal                                   | 1         | None              | 36.4             | 1             |
| #7  | Ma  | 58  | M    | Trisomy 12, Del 13q14                    | 2         | None              | 160.0            | 0             |
| #8  | Fe  | 36  | M    | Del 11q22                                | 4         | None/Chlorambucil | 49.1             | ND            |
| #9  | Ma  | 82  | M    | Del 13q14                                | 1         | Chlorambucil      | 81.0             | 0             |
| #10 | Ma  | 55  | M    | Del 13q14                                | 2         | None              | 102.4            | 1             |
| #11 | Ma  | 47  | M    | Del 13q14                                | 0         | None              | 71.3             | ND            |
| #12 | Fe  | 44  | UM   | Del 13q14                                | 1         | None              | 76.7             | 3             |
| #13 | Ma  | 77  | M    | normal                                   | 0         | Chlorambucil      | 114.9            | ND            |
| #14 | Fe  | 74  | UM   | Del 11q22, Del 13q14                     | 0         | None              | 117.9            | 0             |
| #15 | Ma  | 72  | ND   | Del 13q14                                | ND        | None              | 218.5            | ND            |
| #16 | Ma  | 65  | M    | Trisomy 12                               | 2         | Chlorambucil      | 149.1            | 2             |
| #17 | Ma  | 79  | UM   | lossY                                    | 3         | None              | 49.0             | ND            |
| #18 | Ma  | 71  | M    | Del 13q14                                | 2         | None              | 57.0             | 1             |
| #19 | Fe  | 45  | UM   | Del 13q14                                | ND        | None              | 86.8             | 3             |
| #20 | Fe  | 62  | UM   | Del 6q21, Del 6q23, Del 11q22, Del 13q14 | 1         | None              | 128.1            | ND            |
| #21 | Fe  | 67  | M    | Del 13q14                                | ND        | None              | 62.0             | ND            |
| #22 | Ma  | 78  | M    | Del 13q14                                | 2         | Chlorambucil      | 33.2             | 0             |
| #23 | Ma  | 59  | M    | Del 13q14                                | 0         | None              | 125.6            | 1             |
| #24 | Fe  | 45  | UM   | Del 11q, Del 13q14                       | 2         | FCR               | 9.2              | 0             |

**Patient characteristics:**

Ma=Male, Fe=Female, M=mutated, UM=unmutated, ND=not defined, None=no previous therapy, FCR=Fludarabine+Cyclophosphamide+Rituximab, Umbrella2=GS-4059+Entospletinib+Obinutuzumab
