# Supplementary material for: Optimized Xenograft Protocol for Chronic Lymphocytic Leukemia Results in High Engraftment Efficiency for All CLL Subgroups
Source: MDPI journal article supplement (doi:10.3390/ijms20246277), 2019-12-12
Supplement: s1 [file s1]

**Table S2****Engraftment of human cells**

Engraftment of human CLL cells, B cells and T cells in NOG versus BRG mice. Each number represents the mean of 3-4 mice (\*=3 mice) 28 days after transplantation.

| <b>Spleen</b> | cells/spleen [mio] |      | human cells [%] |      | CLL cells [Tsd] |      | B cells [Tsd] |      | T cells [mio] |       |
|---------------|--------------------|------|-----------------|------|-----------------|------|---------------|------|---------------|-------|
|               | NOG                | BRG  | NOG             | BRG  | NOG             | BRG  | NOG           | BRG  | NOG           | BRG   |
| CLL           |                    |      |                 |      |                 |      |               |      |               |       |
| #1            | 13.0               | 11.7 | 58.9            | 4.8  | 40.2            | 4.6  | 8.9           | 0.1  | 5.5           | 0.20  |
| #2            | 90.4*              | 34.5 | 50.3            | 1.0  | 594.6*          | 16.9 | 296.6*        | 0.9  | 27.9*         | 0.40  |
| #3            | 24.9               | 3.7  | 79.0            | 0.3  | 646.8           | 3.2  | 66.4          | 0.04 | 13.0          | 0.01  |
| #4            | 47.3*              | 18.4 | 36.7            | 1.9  | 755.1*          | 4.4  | 630.7*        | 0.5  | 9.6*          | 0.04  |
| #5            | 5.0                | 5.2  | 16.2            | 0.2  | 498.0           | 2.4  | 25.6          | 0.4  | 0.1           | 0.01  |
| #6            | 22.0               | 6.5  | 26.3            | 42.1 | 18.7            | 9.3  | 8.5           | 3.9  | 5.4           | 2.40  |
| #7            | 8.3                | 2.2  | 23.4            | 0.2  | 98.2            | 1.0  | 98.8          | 0.3  | 1.8           | 0.002 |

| <b>BM</b> | cells/femur [mio] |      | human cells [%] |     | CLL cells [Tsd] |     | B cells [Tsd] |     | T cells [Tsd] |      |
|-----------|-------------------|------|-----------------|-----|-----------------|-----|---------------|-----|---------------|------|
|           | NOG               | BRG  | NOG             | BRG | NOG             | BRG | NOG           | BRG | NOG           | BRG  |
| CLL       |                   |      |                 |     |                 |     |               |     |               |      |
| #1        | 6.1               | 5.5  | 2.1             | 0.1 | 1.5             | 0.1 | 0.6           | 0.0 | 145.4         | 5.7  |
| #2        | 8.5*              | 10.4 | 7.0             | 0.2 | 9.9*            | 0.2 | 8.9*          | 0.1 | 562.5*        | 1.9  |
| #3        | 1.9               | 7.4  | 25.7            | 0.2 | 3.6             | 0.5 | 0.8           | 0.0 | 122.0         | 1.4  |
| #4        | 5.7*              | 8.2  | 8.5             | 0.1 | 17.5*           | 0.3 | 19.7*         | 0.3 | 214.3*        | 5.6  |
| #5        | 10.5              | 10.2 | 1.6             | 0.1 | 72.5            | 1.3 | 53.6          | 0.0 | 11.7          | 0.3  |
| #6        | 3.7               | 8.2  | 8.2             | 0.6 | 5.3             | 1.5 | 0.6           | 0.3 | 269.7         | 44.7 |
| #7        | 4.9               | 7.3  | 8.1             | 0.0 | 12.7            | 0.2 | 38.5          | 0.0 | 281.8         | 0.4  |

| <b>PB</b> | WBC [ $10^3/\text{mm}^3$ ] |     | human cells [%] |     | CLL cells [Tsd] |     | B cells [Tsd] |     | T cells [mio] |       |
|-----------|----------------------------|-----|-----------------|-----|-----------------|-----|---------------|-----|---------------|-------|
|           | NOG                        | BRG | NOG             | BRG | NOG             | BRG | NOG           | BRG | NOG           | BRG   |
| CLL       |                            |     |                 |     |                 |     |               |     |               |       |
| #1        | 22.4                       | 6.9 | 27.3            | 0.3 | 24.9            | 0.6 | 1.0           | 0.0 | 6.9           | 0.02  |
| #2        | 24.4*                      | 6.8 | 44.9            | 0.3 | 44.6*           | 0.3 | 43.7*         | 0.6 | 12.1*         | 0.01  |
| #3        | 7.7                        | 4.9 | 46.1            | 0.0 | 15.9            | 0.0 | 8.6           | 0.0 | 2.6           | 0.0   |
| #4        | 2.7*                       | 3.8 | 2.7             | 0.0 | 2.1*            | 0.5 | 0.1*          | 0.1 | 0.06*         | 0.02  |
| #5        | 5.2                        | 5.4 | 36.2            | 0.2 | 8.2             | 0.1 | 18.1          | 0.1 | 1.4           | 0.007 |
| #6        | 20.2                       | 4.5 | 49.8            | 9.4 | 31.6            | 0.6 | 0.6           | 0.1 | 10.7          | 0.42  |
| #7        | 3.7                        | 5.6 | 6.8             | 0.0 | 5.0             | 0.0 | 5.5           | 0.0 | 0.3           | 0.0   |
